# Supplementary material
Source: PubMed Central journal article supplement (PMC4458389)
Supplement: NIHMS680081-supplement-1.pdf [file NIHMS680081-supplement-1.pdf]

Suppl table II: **Sample HLA typing data for input into RATE tool.** The table shows a part of the sample HLA typing data for the RATE tool.

| Donor-4     | Donor-1     | Donor-2     | Donor-3     | Donor-5     | Donor-7     | Donor-6     | Donor-9     | Donor-10    | Donor-12    |
|-------------|-------------|-------------|-------------|-------------|-------------|-------------|-------------|-------------|-------------|
| DRB1* 11:01 | DRB1* 12:01 | DRB1* 13:01 | DRB1* 03:01 | DRB1* 01:01 | DRB1* 12:01 | DRB1* 07:01 | DRB1* 08:04 | DRB1* 11:01 | DRB1* 04:01 |
| DRB1* 15:03 | DRB1* 15:03 | DRB1* 15:01 | DRB1* 07:01 | DRB1* 07:01 | DRB1* 15:03 | DRB1* 15:03 | DRB1* 15:03 | DRB1* 13:02 | DRB1* 07:01 |
| DRB3*02:02  | DRB3*01:01  | DRB3*02:02  | DRB3*02:02  | DRB3*02:02  | DRB3*01:01  | DRB4*01:03  | DRB5*01:02  | DRB3*02:02  | DRB4*01:03  |
| DRB5*01:01  | DRB5*01:01  | DRB3*02:02  | DRB4*01:03  | DRB4*01:03  | DRB5*01:01  | DRB5*01:01  | n/a         | DRB3*03:01  | DRB4*01:03  |
| DQA1* 01:02 | DQA1* 01:01 | DQA1* 01:02 | DQA1* 02:01 | DQA1* 02:01 | DQA1* 01:01 | DQA1* 01:02 | DQA1* 01:03 | DQA1* 01:02 | DQA1* 02:01 |
| DQA1* 05:05 | DQA1* 01:02 | DQA1* 01:03 | DQA1* 05:01 | DQA1* 05:01 | DQA1* 01:02 | DQA1* 02:01 | DQA1* 04:01 | DQA1* 05:05 | DQA1* 03:03 |
| DQB1* 06:02 | DQB1* 06:02 | DQB1* 06:02 | DQB1* 02:01 | DQB1* 03:02 | DQB1* 06:02 | DQB1* 02:02 | DQB1* 03:19 | DQB1* 06:09 | DQB1* 02:02 |
| DQB1* 06:02 | DQB1* 06:02 | DQB1* 06:04 | DQB1* 05:03 | DQB1* 03:02 | DQB1* 06:02 | DQB1* 06:02 | DQB1* 06:01 | DQB1* 06:09 | DQB1* 02:02 |
| DPA1* 01:03 | DPA1* 02:01 | DPA1* 01:03 | DPA1* 02:01 | DPA1* 01:03 | DPA1* 01:03 |
| DPA1* 03:01 | DPA1* 02:02 | DPA1* 02:01 | DPA1* 02:01 | DPA1* 02:01 | DPA1* 03:01 | DPA1* 02:01 | DPA1* 02:02 | DPA1* 01:03 | DPA1* 01:03 |
| DPB1* 03:01 | DPB1* 01:01 | DPB1* 04:01 | DPB1* 13:01 | DPB1* 17:01 | DPB1* 18:01 | DPB1* 01:01 | DPB1* 01:01 | DPB1* 02:01 | DPB1* 04:01 |
| DPB1* 02:01 | DPB1* 13:01 | DPB1* 11:01 | DPB1* 17:01 | DPB1* 01:01 | DPB1* 02:01 | DPB1* 02:01 | DPB1* 13:01 | DPB1* 02:01 | DPB1* 02:01 |
